# Supplementary material for: Game—The Beer Transportation Game: How to Decarbonize Logistics by Moving Freight to Sustainable Transport Modes
Source: Atypon-hosted journal article supplement (doi:10.1287/ited.2019.0218), 2020-01-01
Supplement: ited.2019.0218.sm2.pdf [file ited.2019.0218.sm2.pdf]

## Beer Transportation Game

You are the logistics manager of a beer brewer and have to make transport mode decisions: Either ship the volume from Brussels to London using road trips every day, or alternatively, use a train that operates on Monday, Wednesday, and Friday. Road transport can ship any flexible volume and rail transport requires the same fixed quantity in every delivery. Evaluate your decisions by simulating the impact on the total logistics costs and emissions.

The simulation works as follows:

At the beginning of every day, you receive shipment from road or rail transport and replenish your inventory. Then, the demand is realized by throwing three dices. If the on-hand inventory is larger than demand, excessive stock will be kept to the next period with a holding cost; if the on-hand inventory is less than demand, a stock-out occurs and unmet demand will be backordered to the next period with a stock-out penalty cost. Finally, you make a replenishment order following the base-stock policy<sup>1</sup>, which will arrive at the beginning of the next day. The parameters are summarized in Table 1. Simulate one week and compare the performance of using road transport with the performance of using rail transport. Use the same demand in order to have a fair comparison.

*Table 1: A list of parameters used in the game*

| Description                           | Value | Unit                 |
|---------------------------------------|-------|----------------------|
| Cost of road transport                | 400   | EUR per FCL          |
| Cost of rail transport                | 350   | EUR per FCL          |
| Carbon emissions of road transport    | 0.72  | ton per FCL shipment |
| Carbon emissions of rail transport    | 0.20  | ton per FCL shipment |
| Unit inventory holding cost           | 136   | EUR per FCL per day  |
| Unit inventory stock-out penalty cost | 2584  | EUR per FCL per day  |
| Mean of daily demand at the DC        | 10.5  | FCL                  |
| Standard deviation of daily demand    | 3     | FCL                  |

---

<sup>1</sup> You may find more descriptions on the base-stock policy in the file "BeerTransportationGame"

Table 2: Simulation sheet when using road transport to ship freight.

| Week day | Start inv (FCL) | Receive from road (FCL) | Inv before demand (FCL) | Demand (FCL) | Inv after demand (FCL) | Order via road (FCL) | Transp cost (EUR) | Inv Cost (EUR) | Total cost (EUR) | Emissions (ton) |
|----------|-----------------|-------------------------|-------------------------|--------------|------------------------|----------------------|-------------------|----------------|------------------|-----------------|
| Mon      | -               | -                       | 15                      |              |                        |                      |                   |                |                  |                 |
| Tue      |                 |                         |                         |              |                        |                      |                   |                |                  |                 |
| Wed      |                 |                         |                         |              |                        |                      |                   |                |                  |                 |
| Thu      |                 |                         |                         |              |                        |                      |                   |                |                  |                 |
| Fri      |                 |                         |                         |              |                        |                      |                   |                |                  |                 |
| Sat      |                 |                         |                         |              |                        |                      |                   |                |                  |                 |

Average total transportation cost per day is: \_\_\_\_\_

Average total inventory cost per day is: \_\_\_\_\_

Average total logistics cost per day is: \_\_\_\_\_

Average total carbon emission per day is: \_\_\_\_\_

The number of days without a stock-out at the DC is: \_\_\_\_\_

Table 3: Simulation sheet when using rail transport to ship freight

| Week day | Start inv (FCL) | Receive from rail (FCL) | Inv before demand (FCL) | Demand (FCL) | Inv after demand (FCL) | Order via rail (FCL) | Transp cost (EUR) | Inv Cost (EUR) | Total cost (EUR) | Emissions (ton) |
|----------|-----------------|-------------------------|-------------------------|--------------|------------------------|----------------------|-------------------|----------------|------------------|-----------------|
| Mon      | -               | -                       | 15                      |              |                        | 21                   |                   |                |                  |                 |
| Tue      |                 |                         |                         |              |                        |                      |                   |                |                  |                 |
| Wed      |                 |                         |                         |              |                        |                      |                   |                |                  |                 |
| Thu      |                 |                         |                         |              |                        |                      |                   |                |                  |                 |
| Fri      |                 |                         |                         |              |                        |                      |                   |                |                  |                 |
| Sat      |                 |                         |                         |              |                        |                      |                   |                |                  |                 |

Hint: The expected demand of two days is 21 FCL. You want to make your total shipment the same as the total demand, and hence ship 21 FCLs every time the train operates. No base-stock policy is applied to control rail shipments here.

Average total transportation costs per day is: \_\_\_\_\_

Average total inventory costs per day is: \_\_\_\_\_

Average total logistics cost per day is: \_\_\_\_\_

Average total carbon emission per day is: \_\_\_\_\_

The number of days without a stock-out at the DC is: \_\_\_\_\_

Please design your strategy to combine both road and rail transport.

Table 4: Simulation sheet when use both road and rail transport to ship freight

| Week day | Start inv (FCL) | Receive from road (FCL) | Receive from rail (FCL) | Inv before demand (FCL) | Demand (FCL) | Inv after demand (FCL) | Order via road (FCL) | Order via rail (FCL) | Transp cost (EUR) | Inv Cost (EUR) | Total cost (EUR) | Emissions (ton) |
|----------|-----------------|-------------------------|-------------------------|-------------------------|--------------|------------------------|----------------------|----------------------|-------------------|----------------|------------------|-----------------|
| Mon      | -               | -                       | -                       | 15                      |              |                        |                      |                      |                   |                |                  |                 |
| Tue      |                 |                         |                         |                         |              |                        |                      |                      |                   |                |                  |                 |
| Wed      |                 |                         |                         |                         |              |                        |                      |                      |                   |                |                  |                 |
| Thu      |                 |                         |                         |                         |              |                        |                      |                      |                   |                |                  |                 |
| Fri      |                 |                         |                         |                         |              |                        |                      |                      |                   |                |                  |                 |
| Sat      |                 |                         |                         |                         |              |                        |                      |                      |                   |                |                  |                 |

Hint: You want to first fix the shipment volume in rail transport, and then use the base-stock control to decide the shipment volume in road transport every day.

Average total transportation cost per day is: \_\_\_\_\_

Average total inventory cost per day is: \_\_\_\_\_

Average total logistics cost per day is: \_\_\_\_\_

Average total carbon emission per day is: \_\_\_\_\_

The number of days without a stock-out at the DC is: \_\_\_\_\_
